# Supplementary material for: Pioglitazone Protected against Cardiac Hypertrophy via Inhibiting AKT/GSK3βand MAPK Signaling Pathways
Source: Hindawi journal article supplement (doi:10.1155/2016/9174190), 2016-01-01
Supplement: f1 [file 9174190.f1.pdf]

**Pioglitazone protected against cardiac hypertrophy via inhibiting  
AKT/GSK-3 $\beta$  and MAPK signaling pathways**

Wen-Ying Wei\*, Zhen-Guo Ma\*, Si-Chi Xu, Ning Zhang, Qi-Zhu Tang

Department of Cardiology, Renmin Hospital of Wuhan University, Wuhan, China  
Cardiovascular Research Institute of Wuhan University, Wuhan, China

Corresponding author: Qi-Zhu Tang, Department of Cardiology, Renmin Hospital of Wuhan University; Cardiovascular Research Institute, Wuhan University at Jiefang Road 238, Wuhan 430060, China. E-mail: [qztang@whu.edu.cn](mailto:qztang@whu.edu.cn)

\*These authors contributed equally to this work.

Short title: Pioglitazone against cardiac hypertrophy

**SUPPLEMENTAL FIGURES AND FIGURE LEGENDS:**

**Supplemental Figure S1**

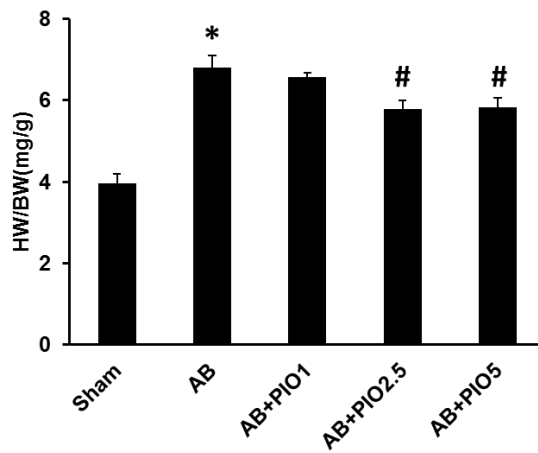

**Figure S1. Effects of PIO on cardiac hypertrophy.** Mice subjected to AB were given PIO (1 mg/kg, 2.5 mg/kg or 5 mg/kg) treatment for 3 weeks. Statistical results of heart weight (HW)/ body weight (BW) in the indicated groups (n=5).
